# Supplementary material for: A 3D-cascade-microlens optofluidic chip for refractometry with adjustable sensitivity
Source: Royal Society of Chemistry journal article supplement (doi:10.1039/d1lc00570g), 2021-01-01
Supplement: d1lc00570g1.pdf [file d1lc00570g1.pdf]

## 3D-Cascade-Microlens Optofluidic Chip for Refractometry with Adjustable Sensitivity

Jiukai Tang<sup>1,2</sup>, Guangyu Qiu<sup>1,2</sup>, Xiaole Zhang<sup>1,2</sup>, Jing Wang<sup>1,2\*</sup>

1 Institute of Environmental Engineering, ETH Zürich, Zürich 8093, Switzerland

2 Laboratory for Advanced Analytical Technologies, Empa, Swiss Federal Laboratories for Materials Science and Technology, Dübendorf 8600, Switzerland

### Supporting Information

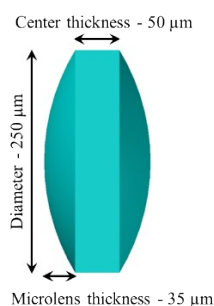

**Fig. S1** Microlens dimensions

Considering no obvious sensitivity enhancement after increasing the curvature radius of microlens from 35 to 45  $\mu\text{m}$ , 35  $\mu\text{m}$  was determined as the microlens thickness for 3DCMOC.

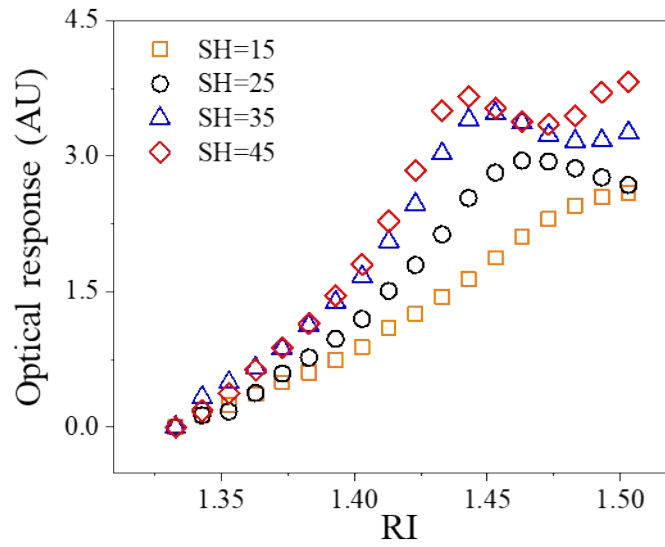

**Fig. S2** Effects of microlens thickness on results originated from the five-microlens configuration

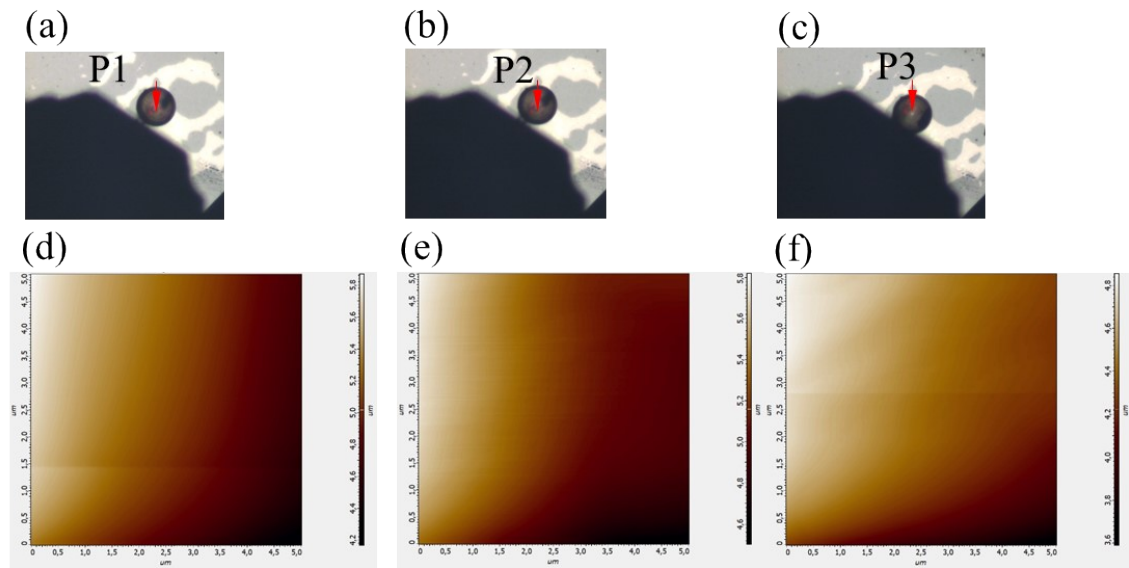

**Fig. S3** Roughness characterization of microlens surface. (a), (b), and (c) are the captured images showing the scanning area ( $5 \times 5 \mu\text{m}$ , as indicated by the arrows in images) on the microlens. (e), (d), and (f) are the height profile of microlens surface corresponding to the areas in (a), (b), and (c).

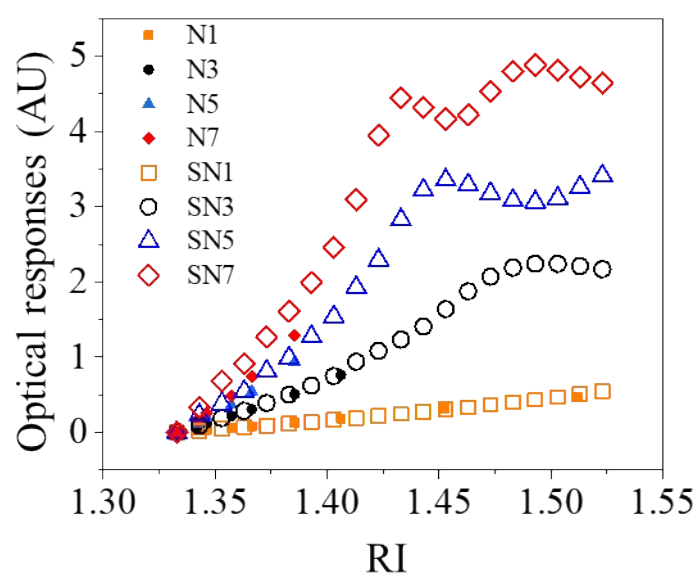

**Fig. S4** Comparison of simulation and experiment results

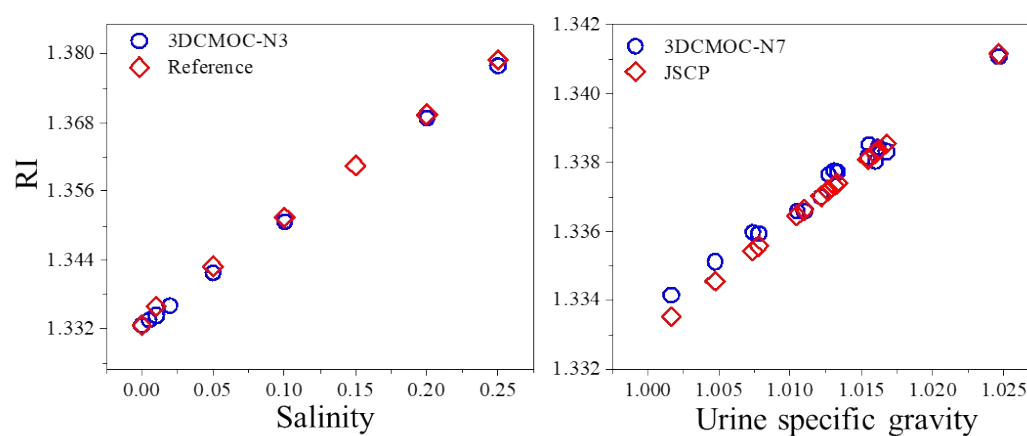

**Fig. S5** Comparison between data in this work and reported results. (a) Sodium chloride samples. (b) Urine samples.

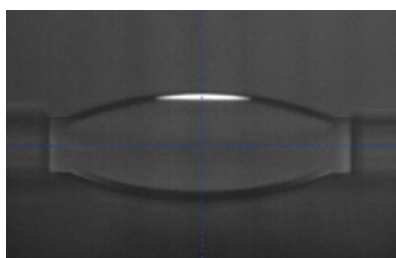

## **Video 1** Process of printing microlens mold
